# Supplementary material for: Stable solvent for solution-based electrical doping of semiconducting polymer films and its application to organic solar cells
Source: Royal Society of Chemistry journal article supplement (doi:10.1039/c8ee00811f), 2018-01-01
Supplement: c8ee00811f1.pdf [file c8ee00811f1.pdf]

## Supplementary Information

### **Stable solvent for solution-based electrical doping of semiconducting polymer films and its application to organic solar cells**

Felipe A. Larrain<sup>1</sup>, Canek Fuentes-Hernandez<sup>1</sup>, Wen-Fang Chou<sup>1</sup>, Victor A. Rodriguez-Toro<sup>1</sup>, Tzu-Yen Huang<sup>2</sup>, Michael F. Toney<sup>2</sup> and Bernard Kippelen<sup>1\*</sup>

<sup>1</sup>Center for Organic Photonics and Electronics (COPE), School of Electrical and Computer Engineering, Georgia Institute of Technology, Atlanta, GA 30332, USA.

<sup>2</sup>Stanford Synchrotron Radiation Laboratory (SSRL), SLAC National Accelerator Laboratory, Menlo Park, California 94025, USA.

\*Correspondence to: [kippelen@gatech.edu](mailto:kippelen@gatech.edu)

**Table S1. Solvents used to dissolve PMA and their properties.**

| Solvent            | Hansen Space<br>(as in HsPiP 5.0.04) |            |            |                | NFPA 704 |              |             |
|--------------------|--------------------------------------|------------|------------|----------------|----------|--------------|-------------|
|                    | $\delta D$                           | $\delta P$ | $\delta H$ | Distance to NM | Health   | Flammability | Instability |
| Nitromethane (NM)  | 15.8                                 | 18.8       | 6.1        | -              | 2        | 3            | 4           |
| Acetonitrile       | 15.3                                 | 18         | 6.1        | 1.28           | 2        | 3            | 0           |
| Dimethyl sulfoxide | 18.4                                 | 16.4       | 10.2       | 7.04           | 2        | 2            | 0           |
| Dimethylformamide  | 17.4                                 | 13.7       | 11.3       | 7.96           | 2        | 2            | 0           |
| 2-methoxyethanol   | 16                                   | 8.2        | 15         | 13.85          | 3        | 2            | 2           |
| 2-propanol         | 15.8                                 | 6.1        | 16.4       | 16.35          | 1        | 2            | 1           |
| Ethanol            | 15.8                                 | 8.8        | 19.4       | 16.64          | 2        | 3            | 0           |

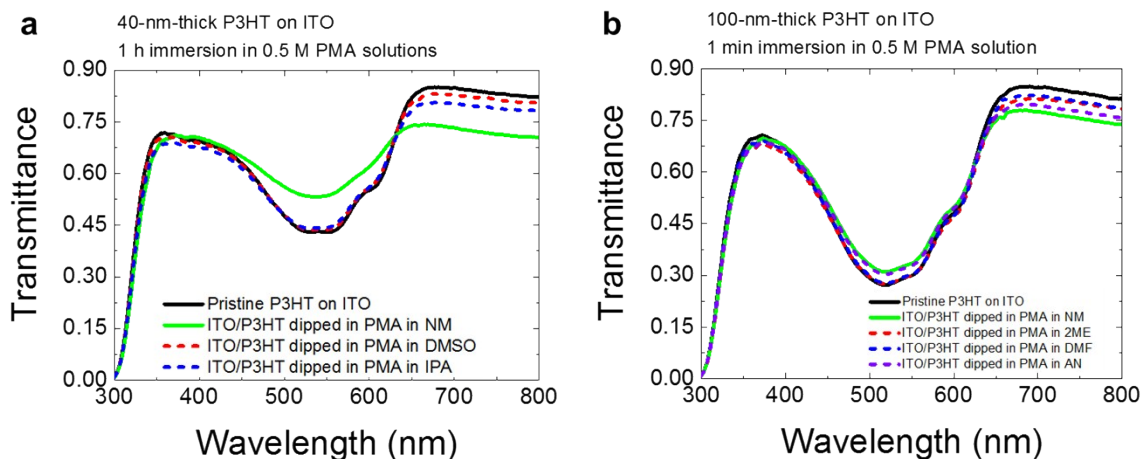

**Figure S1. Transmittance spectra of pristine P3HT and PMA-im-P3HT, when using various solvents to dissolve PMA. a,** Transmittance spectra of 40-nm-thick P3HT on ITO, pristine or immersed in several 0.5 M PMA solutions for 1 h. In the legend, ‘NM’ stands for nitromethane, ‘DMSO’ is dimethyl sulfoxide and ‘IPA’ is isopropyl alcohol. **b,** Transmittance spectra of 100-nm-thick P3HT on ITO, pristine or immersed in several 0.5 M PMA solutions for 1 min. In the legend, ‘2ME’ stands for 2-methoxyethanol, ‘DMF’ is dimethylformamide and ‘AN’ is acetonitrile. All measurements were conducted in air, although the immersion step was conducted inside a N<sub>2</sub>-filled glovebox.

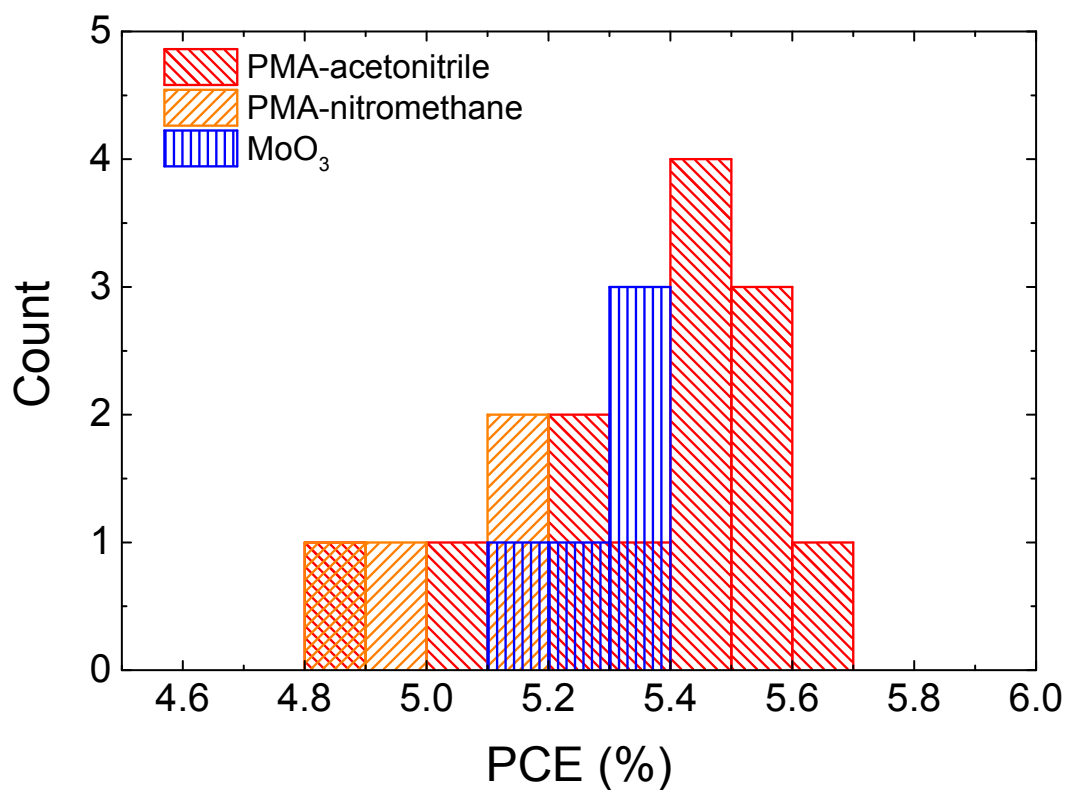

**Figure S2. Histogram of PCEs measured under AM 1.5G solar simulation, including populations of organic solar cells doped with PMA-acetonitrile, PMA-nitromethane or with an evaporated MoO<sub>3</sub> hole-collecting layer. All measurements were conducted in inert atmosphere and before exposing these devices to air.**

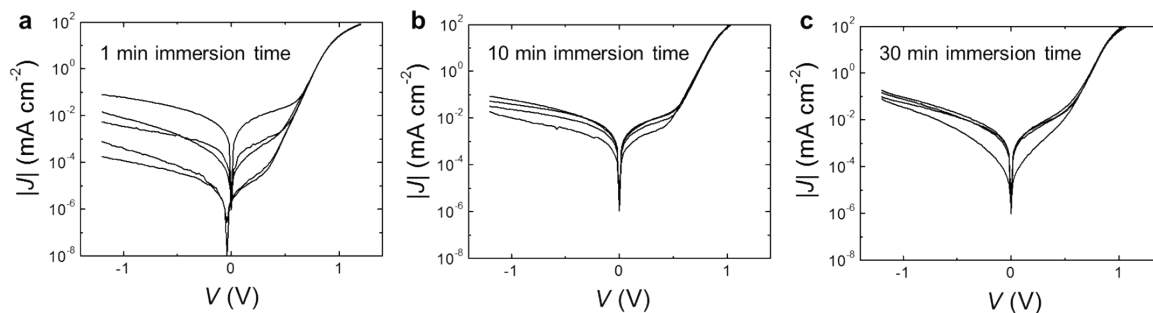

**Figure S3.  $J$ - $V$  characteristic of solar cells in the dark, doped for various times. a,  $J$ - $V$  characteristic of 200 nm-thick PMA-im-P3HT:ICBA OPVs, doped using PMA in acetonitrile for 1 min. b,  $J$ - $V$  characteristic of 200 nm-thick PMA-im-P3HT:ICBA OPVs, doped using PMA in acetonitrile for 10 min. c,  $J$ - $V$  characteristic of 200 nm-thick PMA-im-P3HT:ICBA OPVs, doped using PMA in acetonitrile for 30 min. All measurements were conducted after 10 min soaking under 1-sun illumination in a  $N_2$ -filled glovebox.**

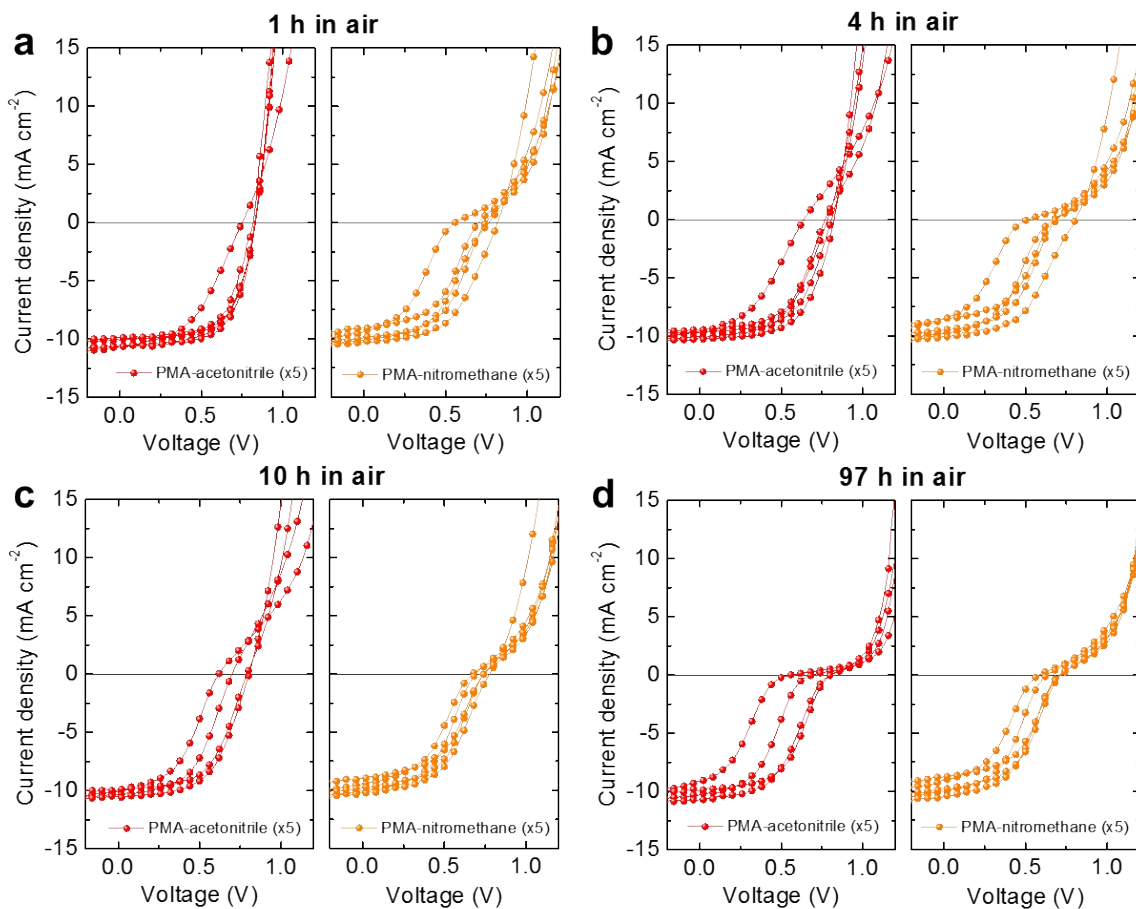

**Figure S4.  $J$ - $V$  characteristic of solar cells doped with PMA after air exposure.** **a**,  $J$ - $V$  characteristic of 200 nm-thick PMA-im-P3HT:ICBA OPVs, doped using PMA in acetonitrile for 1 min or PMA in nitromethane for 1 min, after 1 h exposure to air. **b**,  $J$ - $V$  characteristic of 200 nm-thick PMA-im-P3HT:ICBA OPVs, doped using PMA in acetonitrile for 1 min or PMA in nitromethane for 1 min, after 4 h exposure to air. **c**,  $J$ - $V$  characteristic of 200 nm-thick PMA-im-P3HT:ICBA OPVs, doped using PMA in acetonitrile for 1 min or PMA in nitromethane for 1 min, after 10 h exposure to air. **d**,  $J$ - $V$  characteristic of 200 nm-thick PMA-im-P3HT:ICBA OPVs, doped using PMA in acetonitrile for 1 min or PMA in nitromethane for 1 min, after 97 h exposure to air. All measurements were conducted after 10 min soaking under 1-sun illumination in a  $N_2$ -filled glovebox.

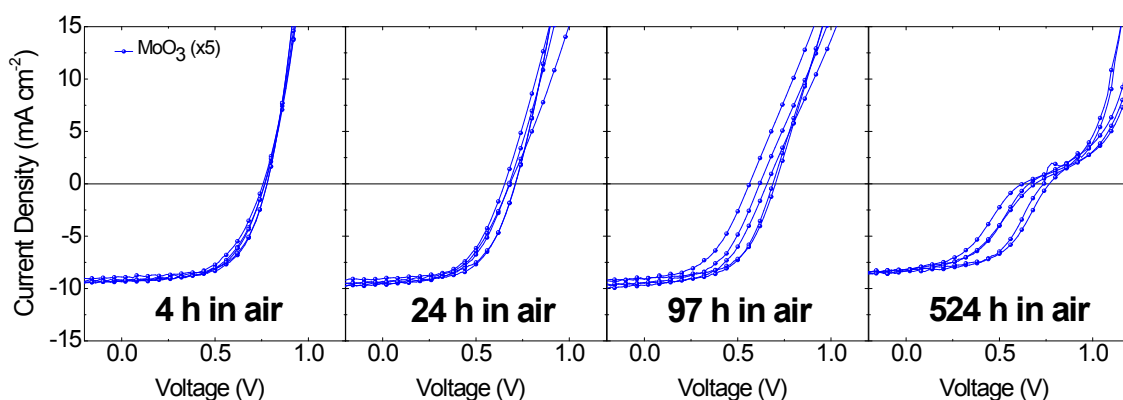

**Figure S5.  $J$ - $V$  characteristic of reference solar cells after air exposure. a,**  $J$ - $V$  characteristic of 200 nm-thick P3HT:ICBA OPVs, with a 10 nm MoO<sub>3</sub> layer for hole collection, after 4 h exposure to air. **b,**  $J$ - $V$  characteristic of 200 nm-thick P3HT:ICBA OPVs, with a 10 nm MoO<sub>3</sub> layer for hole collection, after 24 h exposure to air. **c,**  $J$ - $V$  characteristic of 200 nm-thick P3HT:ICBA OPVs, with a 10 nm MoO<sub>3</sub> layer for hole collection, after 97 h exposure to air. **d,**  $J$ - $V$  characteristic of 200 nm-thick P3HT:ICBA OPVs, with a 10 nm MoO<sub>3</sub> layer for hole collection, after 524 h exposure to air. All measurements were conducted after 10 min soaking under 1-sun illumination in a N<sub>2</sub>-filled glovebox.
